# Supplementary material for: Study on the evolution of ecological environment and irrigation behavior since mulched drip irrigation in Yanqi Basin, Xinjiang
Source: Research Square preprint supplement (doi:10.21203/rs.3.rs-5035326/v1), 2025-04-04
Supplement: Supplementary file 1 [file 5f6afa2a6e0a3c4df569e113.xlsx]

## Sheet: irrigated
years	Water-saving irrigation area （km2）	Proportion of water-saving irrigation （%）	Water use for agricultural irrigation （108 m³）
2002	65.52	0.4095	8.0843
2003	66.86	0.417875	9.46
2004	66.86	0.417875
2005	70.18	0.438625	9.72
2006	74.03	0.462688	10.54
2007	76.96	0.481
2008	80.56	0.5035	9.73
2009	90.99	0.568688	10
2010	96.8	0.605	9.38
2011	105.85	0.661562	9.7484
2012			11.1675
2013	110.56	0.691
2014	123.83	0.773938
2015			15.9948
2016	126.82	0.792625
2017	128.58	0.803625
2018	132.05	0.825312
2019	133.36	0.8335
2020			16
