# Supplementary material for: Study on the evolution of ecological environment and irrigation behavior since mulched drip irrigation in Yanqi Basin, Xinjiang
Source: Research Square preprint supplement (doi:10.21203/rs.3.rs-5035326/v1), 2025-04-04
Supplement: Supplementary file 2 [file 92f70a9486d5d42b6f87a77e.xlsx]

## Sheet: 1999
Serial number	Groundwater Depth （m)	Total soluble solids (mg/L)
HJ1	2.76	3154
HJ2	2.33	2496
HJ3	2.11	1956
HJ4	2.6	486
HJ5	10.83	382
HJ6	7.57	360
HJ7	2.48	618
HJ8	6.15	470
HJ9	2.19	466
HJ10	3.54	312
HJ11	1.6	402
HJ12	4.56	496
HJ13	22.49	342
HJ14	1.16	1928
HJ15	3.2	2818
HJ16	2.1	2404
HJ17	1.97	6214
HJ18	2.6	356
HJ19	1.35	424
HJ20	1.06	898
HJ21	3.11	678
HJ22	2.39	540
HJ23	2.76	2544
HJ24	2.72	2568
HJ25	1.62	906
HJ26	3.28	1900
HJ27	2.2	17822
HJ28	2.24	2876
HJ29	2.98	1780
HJ30	2.4	2618
HJ31	8.27	718
HJ32	8.7	1298
HJ33	2.15	21935
HJ34	1.17	28742
HJ35	1.9	30064
HJ36	13.03	780
HJ37	2.89	478
HJ38	1.2	396
HJ39	10.19	628
HJ40	3.37	632
HJ41	4.31	270
HS1	3	4424
HS3	2.65	780
HS4	79.15	594
HS5	4.71	4016
HS7	2.13	30712
HS8	4.8	644
HS10	1.5	50418
HS11	29.39	721
HS12	36.98	426
HS13	4.19	356
HS14	2.55	6150
HS15	12.89	236
HS17	0.7	5068
HS18	34.23	198
HS19	29.86	374
HS20	61.12	590
HS21	10.15	386
HS22	27.37	368
HS23	2.2	7032
HS24	2.72	16900
HS25	6.76	4826
HS26	12.12	652
HS27	4.13	1150
HS28	1.98	2070
HS29	0.3	24020
HS30	2.2	504
HS31	2.05	7486
HS32	1.83	1758
HS33	48.49	244
HS34	2.07	738
HS35	3	4770
HS36	1.65	28064
HS37	1.85	704
HS38	1.35	16378
HS39	1.6	1148
HS40	12.62	596
HS41	0.72	7166
HS42	14.16	5990
HS43	1.49	30300
HS44	1.29	27312
HS45	3.02	4490
HS46	2.2	7162
HS47	1.5	62792
HS48	10.82	290
HS49	42	420
HS50	41.5	620
HS51	39.5	260
HS52	12.85	840
HS53	30	6330
HS54	11.7	6600
HS55	1.8	7430
HS56	31.8	1680
YQ1	1.61	972
YQ2	1.6	1896
YQ3	2.4	2060
YQ4	1.65	2006
YQ5	1.55	610
YQ6	2.3	442
YQ7	36.11	502
YQ8	1.6	49156
YQ9	1.75	24160
YQ10	1.35	2548
YQ11	2.07	2018
YQ12	3.05	938
YQ13	1.1	882
YQ14	1.38	1688
YQ15	0.6	18396
YQ16	0.51	19808
YQ17	1.08	3616
YQ18	1.38	1464
YQ19	1.78	4062
YQ20	1.22	1380
YQ21	2.2	1092
YQ22	1.04	19229
YQ23	2.28	1085
YQ24	1.45	894
YQ25	2.55	570
YQ26	1.7	457
YQ27	32.51	412
YQ28	5.61	418
YQ29	1.65	1327
YQ30	1.6	13731
YQ31	1.44	3074
YQ32	4.33	582
YQ33	12.45	0
YQ34	5.73	1046
YQ35	1.9	20476
YQ36	6.39	754
YQ37	2.75	788
YQ38	1.42	0
YQ39	2.17	1380
YQ40	1.9	611
YQ50	2.5	14160
YQ51	1.2	1860
YQ52	2.1	609
YQ53	2.02	392
YQ54	1.8	2020
YQ55	1.65	4920
YQ56	1.9	1350
YQ57	6.5	263
YQ58	17	338
YQ59	1.45	1580
YQ60	1.25	982
YQ61	1.2	428
YQ62	1.63	3330
BH1	1.55	94750
BH2	1.08	213168
BH3	1.47	2328
BH4	1.4	7626
BH5	0.65	6128
BH6	1.25	4588
BH7	1.8	36800
BH8	1.52	1420
BH9	1.8	665
BH10	2	1290
BH11	28.44	720
BH12	20.76	1082
BH14	25.52	1120
BH17	10.17	582
BH19	20.54	1700
BH20	0.97	44000
BH21	1.91	30800
BH22	2.25	2260
BH23	1.76	703
BH24	2.36	886
BH25	0.55	4794
BH26	3.21	2160
BH27	2.57	961
BH28	2.72	1010
BH29	2.45	7000
BH31	2.8	1090
BH33	1.58	1480
BH34	2.3	596
BH35	3.04	2130
BH36	2.38	634
BH37	1.73	1740
BH38	1.55	612
BH39	2	990
BH40	48.18	460
BH41	75.95	1030
BH42	111	1110

## Sheet: 2005
Serial number	Groundwater Depth （m)	Total soluble solids (mg/L)
M057	2	1718.45
M060	1.83	2124.74
M063	1.27	1306.52
M064	1.57	1832.83
M065	1.13	3020.67
M066	1.76	1004.39
M067	1.85	694.319
M068	1.14	3864.35
M069	1.85	5188.04
M071	1.97	5840.55
M072	1.2	6160.46
M073	1.41	743.737
M074	1.15	50150.7
M075		10996.8
BZ-4	1.25	797.492
BZ-5	1.15	2334.88
BZ-8	1.1	1056.98
BZ-9	1.1	4026.19
M023	1.65	879.007
M024	2.1	3948.56
M025	1.67	1622.89
M026	1.75	1074.17
M027	1.12	517.11
M028	1.67	939.573
M029	1.5	667.031
M030	1.78	3996.65
BZ-1	2	9558.1
BZ-2	1.2	4213.43
BZ-3	1.6	1029
M001	1.45	1866.55
M004	2.2	3044.05
M005	1.75	1599.87
M006	1.4	1303.98
M007	1.6	9096.96
M008	3.2	2592.38
M009	0.96	20246.1
M010(水)	12.2	14200.5
M013(水)	2.3	524.301
M019	0.5	62254.5
BZ-10	1.85	2549.14
BZ-11	1.8	5295.05
M031(水)	2.9	620.833
M032	1	2302.21
M033	1.74	8331.7
M034	1.74	605.328
M035	1.58	3524.26
M036	0.75	3048.8
M037	1.56	9399.56
M038	1.78	4305.95
M039	1.38	5704.39
M040	1.14	2893.73
M041	1.15	16764.2
M042	1.2	18006.9
M043	1.49	3385.27
M046	1.32	2032.37
M047	1.48	685.357
M048	1.3	933.152
M049	0.87	807.841
M050	1.15	4095.39
M051	1.6	2090.08
M052	0.79	4771
M053	1.4	5048.48
M055	1.11	2653.22

## Sheet: 2016
Serial number	Groundwater Depth （m)	Total soluble solids (mg/L)
0125		654
0126		850
0128		3948
0130		1606
0131		1162
0133	1.5	1148
0134		964
0135		1178
0136	1.85	1038
0137		260
0138	3.38
0139	3.73
0140	2.16	898
0141	4
0142	5.5
0143	3	376
0144	3.13
0145	4.02
0146	3.46
0147		1028
0148	1.8	1520
0149	2.75
0150	2.2
0151	2.8
0152	3
0153	1.5
0154	3
0155	1.76	908
0156		748
0157	2.45
0158		384
0159	1.85	492
0160	2.13
0161	2.7
0162	2.8
0163	3.33
0164	1.05
0165	2.42
0166		466
0167	0	330
0168	0	302
0169
0170	56
0171	33.88	402
0172	32.26
0173	9.64
0174	13	5074
0175	10	546
0176		306
0177		546
0178		774
0179	2
0180		626
0181		112
0182		1494
0183		228
0184
0185		2224
0186	4
0187	3
0188		32
0189	4.5
0190	5.1
0193	7.3
0194		174
0195	7
0196	18.7
0197	6.15
0198	24.05
0199	48
0200	46.25	916
0201	19.43
0202	14.2
0203	16.88
0204	14.3	1328
0205	11	364
0206	7.87	572
0207
0208	20.46
0209	12
0214	8.5	424
0215	6.2
Q01	3.64
Q02	4.3
Q03	4.66
Q04	4.5
Q05
Q06	3.7
Q07	3.2
Q09
Q10
Q11
Q13
Q14	3.23
Q16	4.18
Q17	4.86
Q30	13.67
Q31	9.8
Q32	16.32
Q33	22
Q34
Q35	16.07
Q36	24.8
Q37	20
Q38	7.59
Q39	12.04
Q40	4.62
Q41	5.2
Q50	7.6
Q51	18.56
Q52	19.28
Q062	15.13
Q063	3.79
Q064	6.08
Q066
Q067	6
Q068	6.82
Q0069	90
点11	75
Q0070	2
Q0071	96
Q0072	1.67
Q0074	62.4
Q0075	33.92
Q0076	46.24
Q0077	70
Q0079	10.72
Q0080	10.04
Q0082	10.48
Q0083	9.8
Q0084	2.73
Q0085
Q0087	17.04
Q0088	25.44
Q0089	40
Q0090	25.2
Q0091	60.8
Q0093	4.19
Q0094
Q0095	26.64
Q0096	17.22
Q0097	20.92
Q0098	53.28
Q0099	80.64
X09	17.6
X10	6.28
X11	5.2
X12
X13	4.72
X15	3.6
X16	2.62
X17	2.53
X29	10.9

## Sheet: 2020
Serial number	Groundwater Depth （m)	Total soluble solids (mg/L)
YQ11		541.8
YQ10	2.38	2163
YQ02		448
YQ59		265.3
YQ56		415.8
M034		395.5
YQ32		440.3
BH36		1376.9
YQ33		506.8
YQ34	11.07	746.9
YQ36		2415
YQ39	1.97
YQ39-1	3.08	4032
YQ39-2	12.28	809.2
M042	20.26	520.1
M049		469.7
YQ12		599.2
BH1		688.1
BH1-1	5.3
BH15	33.01	1498
BH15-1	29.53	1848
BH17		2464
BH17-1	14.27
BH18	29.9	2324
BH18-1		2744
BH18-2		674.8
BH35	1	462
BH33		2667
BH31	2.67	1045.1
BH26	2.81	403.2
BH26-1	2.87
M071	11.2
M071-1		1449
M064		1064.7
BH10	5.6	532.7
BH09	3.4	574.7
BH09-1	6.92
BH08	3.4
BH08-1	3	854.7
BH07	3.2	1561
HJ14	1.28	638.4
HJ15	6.05	1554
HJ16		288.4
HJ35
M053-1	8.24	721
HS2	7.39
HS40		788.2
HS3		261.8
HJ36	10.35	2611
HJ32	12.94
HJ31	13.8	599.2
HJ15-1	70	322.7
HJ28	23.6	268.8
HJ27	7.41
M028		1645
HJ23		1477
M024		326.9
HJ39	14	972.3
		226.1
HJ12	13	443.1
HJ10	9	302.4
HJ9	6.92	352.8
HJ8	12.07	533.4
HJ7	5.62	476.7
HJ6		705.6
HJ5	11.33	753.9
HJ30	9	2219
HJ11	1.6
		569.1
HJ11-1	2.03
HJ38	3.03	308.7
HJ20	3.25	728.7
HJ18	6.01	403.9
HS38	2.47	311.5
		231
HS37		280.7
HS36		1304.8
HS36-1	9.98	394.8
HS15	22.3	312.9
HS12	120	618.1
HS6	21.28
HS6-1	21.08	2751
HS5	28.57	1561
HS20		369.6
HS26		434.7
HS10	20	998.2
HS45	22.45	478.1
M009		239.4
HS28	17	847.7
HS47		285.6
HS33	62	448.7
