# Supplementary material for: Study on the evolution of ecological environment and irrigation behavior since mulched drip irrigation in Yanqi Basin, Xinjiang
Source: Research Square preprint supplement (doi:10.21203/rs.3.rs-5035326/v1), 2025-04-04
Supplement: Supplementary file 3 [file c580e1494fab9aae196cef8e.xlsx]

## Sheet: 2000
ID	Conductivity 0-10cm (ms/cm)	TDS
MS001	1.89696	6.63936
MS002	2.35712	8.24992
MS003	0.235228	0.823298
MS004	1.96736	6.88576
MS005	2.62624	9.19184
MS006	2.11576	7.40516
MS007	4.35088	15.2281
MS008	14.8477	51.9668
MS009	5.1624	18.0684
MS010	0.822466	2.87863
MS011	12.2874	43.0059
MS012	1.26965	4.44377
MS013	16.0566	56.1981
MS014	2.89704	10.1396
MS015	1.52264	5.32925
MS016	22.2896	78.0136
MS017	0.463184	1.62114
MS018	0.541736	1.89608
MS019	29.627	103.694
MS020	1.91302	6.69557
MS021	0.365408	1.27893
MS022	0.245632	0.859712
MS023	0.381344	1.3347
MS024	0.684448	2.39557
MS025	1.10134	3.85469
MS026	0.43456	1.52096
MS027	0.598336	2.09418
MS028	0.39076	1.36766
MS029	0.365936	1.28078
MS030	5.7346	20.0711
MS031	4.62434	16.1852
MS032	8.65	30.275
MS033	9.23161	32.3106
MS034	7.11984	24.9194
MS035	0.47884	1.67594
MS036	6.825	23.8875
MS037	4.123	14.4305
MS038	7.46028	26.111
MS039	2.97346	10.4071
MS040	0.25844	0.90454
MS041	3.0115	10.5403
MS042	0.31108	1.08878
MS043	1.5154	5.3039
MS044	0.3051	1.06785
MS045	0.2268	0.7938
MS046	1.80753	6.32634
MS047	0.547	1.9145
MS048	1.05608	3.69627
MS049	13.8556	48.4946
MS050	1.974	6.909
MS051	2.461	8.6135
MS052	0.32635	1.14223
MS053	0.85344	2.98704
MS054	0.54126	1.89441
MS055	0.61635	2.15723
MS056	0.25944	0.90804
MS057	0.437	1.5295
MS058	0.22256	0.77896
MS059	0.35052	1.22682
MS060	16.6665	58.3326
MS061	1.42978	5.00423
MS062	1.53648	5.37768
MS063	0.104652	0.366282
MS064	0.67706	2.36971
MS065	0.61846	2.16461
MS066	3.128	10.948
MS067	3.4989	12.2462
MS068	1.68525	5.89837
MS069	2.79524	9.78334
MS070	1.44196	5.04686
MS071	15.5257	54.34
MS072	12.8619	45.0166
MS073	4.18	14.63
MS074	12.5778	44.0222
MS075	4.717	16.5095
MS076	4.5404	15.8914
MS077	2.5228	8.8298
MS078	3.384	11.844
MS079	79.2	277.2
MS080	2.772	9.702
MS081	0.12096	0.42336
MS082	2.2042	7.7147
MS083	0.995904	3.48566
MS084	8.7026	30.4591
MS085	2.47776	8.67216
MS086	2.46847	8.63964
MS087	1.63	5.705
MS088	1.28118	4.48414
MS089	9.114	31.899
MS090	1.15618	4.04662
MS091	1.93024	6.75584
MS092	0.8712	3.0492
MS093	1.05514	3.69298
MS094	0.1278	0.4473
MS095	11.6015	40.6054
MS096	1.61619	5.65667
MS097	13.851	48.4785
MS098	47.16	165.06
MS099	2.44374	8.55309
MS100	0.394796	1.38179
MS101	0.123816	0.433356
MS102	2.30178	8.05623
MS103	5.24868	18.3704
MS104	54.5104	190.786
MS105	3.789	13.2615
MS106	2.9072	10.1752
MS107	1.22544	4.28904
MS108	0.68582	2.40037
MS109	0.277548	0.971418
MS110	0.46818	1.63863
MS111	0.42098	1.47343
MS112	0.61272	2.14452
MS113	4.048	14.168
MS114	0.207	0.7245
MS115	31.8556	111.495
MS116	14.994	52.479
MS117	2.1294	7.4529
MS118	0.461776	1.61622
MS119	0.205716	0.720006
MS120	0.967572	3.3865
MS121	75.1328	262.965
MS122	2.6712	9.3492
MS123	0.42504	1.48764
MS124	0.263466	0.922131
MS125	0.2295	0.80325
MS126	1.30502	4.56756
MS127	0.219402	0.767907
MS128	1.31458	4.60102
MS129	3.85154	13.4804
MS130	3.40956	11.9335
MS131	96.33	337.155
MS132	3.078	10.773
MS133	0.66156	2.31546
MS134	0.237804	0.832314
MS135	0.281232	0.984312
MS136	0.382632	1.33921
MS137	2.37804	8.32314
MS138	2.98562	10.4497
MS139	1.8662	6.5317
MS140	3.05944	10.708
MS141	0.285518	0.999313
MS142	1.27362	4.45768
MS143	0.541712	1.89599
MS144	1.70251	5.95879
MS145	0.82248	2.87868
MS146	1.51897	5.31639
MS147	35.9388	125.786
MS148	5.34944	18.723
MS149	0.31602	1.10607
MS150	1.07585	3.76549
MS151	0.712518	2.49381
MS152	3.43662	12.0282
MS153	0.20295	0.710325
MS154	0.137676	0.481866
MS155	2.303	8.0605
MS156	3.17504	11.1126
MS157	0.343296	1.20154
MS158	0.294126	1.02944
MS159	0.13079	0.457765
MS160	0.444416	1.55546
MS161	0.2133	0.74655
MS162	2.23776	7.83216
MS163	0.267306	0.935571
MS164	8.381	29.3335
MS165	1.88852	6.60982
MS166	35.7	124.95
MS167	45.4974	159.241
MS168	53.31	186.585
MS169	0.099296	0.347536
MS170	0.138316	0.484106
MS171	0.206976	0.724416
MS172	0.114432	0.400512
MS173	0.211584	0.740544
MS174	2.3128	8.0948
MS175	0.15114	0.52899
MS176	0.305312	1.06859
MS177	0.337792	1.18227
MS178	0.333648	1.16777
MS179	0.25024	0.87584
MS180	2.116	7.406
MS181	0.155232	0.543312
MS182	0.573804	2.00831
MS183	8.54784	29.9174
MS184	0.339696	1.18894
MS185	0.685184	2.39814
MS186	0.341508	1.19528
MS187	0.195808	0.685328
MS188	0.242528	0.848848
MS189	1.2983	4.54406
MS190	0.23368	0.81788
MS191	2.05842	7.20447
MS192	0.113792	0.398272
MS193	0.51304	1.79564
MS194	0.40704	1.42464
MS195	0.38364	1.34274
MS196	0.28514	0.99799
MS197	0.53084	1.85794
MS198	0.39816	1.39356
MS199	1.69946	5.94812
MS200	0.35392	1.23872
MS201	0.16704	0.58464
MS202	0.200448	0.701568
MS203	0.120098	0.420343
MS204	0.610764	2.13767
MS205	0.172788	0.604758
MS206	0.45849	1.60472
MS207	1.37994	4.82978
MS208	0.139232	0.487312
MS209	0.71126	2.48941
MS210	0.480704	1.68246
MS211	4.9922	17.4727
MS212	1.75218	6.13263
MS213	2.2048	7.7168
MS214	0.3074	1.0759
MS215	0.198592	0.695072
MS216	1.67992	5.87972
MS217	1.26858	4.44002
MS218	0.275968	0.965888
MS219	0.129156	0.452046
MS220	0.364026	1.27409
MS221	0.47488	1.66208
MS222	0.269304	0.942564
MS223	1.9021	6.65734
MS224	0.243712	0.852992
MS225	0.731808	2.56133
MS226	0.646696	2.26344
MS227	1.81888	6.36608
MS228	0.741888	2.59661
MS229	2.36262	8.26917
MS230	0.410368	1.43629
MS231	0.50508	1.76778
MS232	2.71904	9.51664
MS233	0.390656	1.3673
MS234	0.463496	1.62224
MS235	0.646912	2.26419
MS236	0.3174	1.1109
MS237	5.9148	20.7018
MS238	0.33892	1.18622
MS239	2.55528	8.94348
MS240	0.244992	0.857472
MS241	0.884352	3.09523
MS242	1.13832	3.98412
MS243	2.84928	9.97248
MS244	1.5423	5.39805
MS245	2.02884	7.10094
MS246	1.27232	4.45313
MS247	0.2748	0.9618
MS248	32.0624	112.218
MS249	0.22601	0.791035
MS250	0.93174	3.26109
MS251	3.0268	10.5938
MS252	2.3184	8.1144
MS253	0.67712	2.36992
MS254	1.87691	6.5692
MS255	0.875952	3.06583
MS256	0.2977	1.04195
MS257	6.76338	23.6718
MS258	8.82768	30.8969
MS259	2.556	8.946
MS260	2.541	8.8935
MS261	10.9771	38.4199
MS262	0.781376	2.73482
MS263	0.2862	1.0017
MS264	0.34224	1.19784
MS265	0.45903	1.60661
MS266	0.197568	0.691488
MS267	0.306	1.071
MS268	3.3108	11.5878
MS269	0.136422	0.477477
MS270	1.77253	6.20386
MS271	0.49685	1.73897
MS272	1.73355	6.06743
MS273	0.72695	2.54433
MS274	1.6623	5.81805
MS275	2.3219	8.12665
MS276	1.927	6.7445
MS277	1.16737	4.08579
MS278	0.59563	2.08471
MS279	2.38252	8.33882
MS280	3.17982	11.1294
MS281	0.223244	0.781354
MS282	0.43228	1.51298
MS283	0.41405	1.44918
MS284	2.0097	7.03395
MS285	17.21	60.235
MS286	24.708	86.478
MS287	1.52519	5.33816
MS288	0.8667	3.03345
MS289	0.3519	1.23165
MS290	0.13104	0.45864
MS291	0.77517	2.71309
MS292	0.67164	2.35074
MS293	0.676386	2.36735
MS294	1.26126	4.41441
MS295	0.4797	1.67895
MS296	0.61439	2.15036
MS297	0.24388	0.85358
MS298	0.68541	2.39893
MS299	0.7087	2.48045
MS300	1.972	6.902
MS301	1.775	6.2125
MS302	2.362	8.267
MS303	0.982	3.437
MS304	3.40578	11.9202
MS305	0.30576	1.07016
MS306	0.470876	1.64807
MS307	0.624	2.184
MS308	0.998	3.493
MS309	0.33512	1.17292
MS310	3.1122	10.8927
MS311	4.7616	16.6656
MS312	0.58029	2.03102
MS313	0.437886	1.5326
MS314	0.32592	1.14072
MS315	1.54489	5.4071
MS316	5.14224	17.9978
MS317	0.678294	2.37403
MS318	0.55601	1.94603
MS319	0.24	0.84
MS320	0.8397	2.93895
MS321	0.7686	2.6901
MS322	0.5913	2.06955
MS323	18.124	63.434
MS324	1.41596	4.95586
MS325	3.303	11.5605
MS326	2.3403	8.19105
MS327	0.486	1.701
MS328	0.4693	1.64255
MS329	2.5608	8.9628
MS330	0.2016	0.7056
MS331	0.82745	2.89608
MS332	0.892944	3.1253
MS333	0.58331	2.04158
MS334	2.6709	9.34815
MS335	1.01964	3.56874
MS336	0.65247	2.28364
MS337	0.8778	3.0723
MS338	2.1021	7.35735
MS339	1.17117	4.0991
MS340	1.291	4.5185
MS341	1.89312	6.62592
MS342	0.92983	3.25441
MS343	1.5867	5.55345
MS344	0.703098	2.46084
MS345	1.40333	4.91167
MS346	1.37137	4.79979
MS347	0.73892	2.58622
MS348	1.1007	3.85245
MS349	0.30281	1.05984
MS350	0.6783	2.37405
MS351	0.5278	1.8473
MS352	0.50397	1.7639
MS353	0.369104	1.29186
MS354	0.19902	0.69657
MS355	0.9027	3.15945
MS356	0.46788	1.63758
MS357	0.5859	2.05065
MS358	2.3861	8.35135
MS359	0.267	0.9345
MS360	2.7606	9.6621
MS361	0.606048	2.12117
MS362	0.4104	1.4364
MS363	0.278	0.973
MS364	0.2345	0.82075
MS365	0.7809	2.73315
MS366	0.669732	2.34406
MS367	0.43977	1.53919
MS368	0.22659	0.793065
MS369	1.27309	4.45581
MS370	0.33	1.155
MS371	2.3843	8.34505
MS372	6.6405	23.2417
MS373	2.7492	9.6222
MS374	0.88825	3.10887
MS375	0.40572	1.42002
MS376	0.19152	0.67032
MS377	2.8119	9.84165
MS378	1.10403	3.86409
MS379	0.4581	1.60335
MS380	1.7922	6.2727
MS381	1.19847	4.19464
MS382	3.6792	12.8772
MS383	0.824502	2.88576
MS384	2.8797	10.0789
MS385	3.3048	11.5668
MS386	1.77365	6.20778
MS387	32.7699	114.695
MS388	1.81059	6.33707
MS389	16.4937	57.7281
MS390	0.5463	1.91205
MS391	1.33315	4.66603
MS392	28.2338	98.8183
MS393	1.11693	3.90925
MS394	0.28449	0.995715
MS395	0.34295	1.20032
MS396	0.78435	2.74523
MS397	1.11412	3.89942
MS398	3.8728	13.5548
MS399	3.358	11.753
MS400	15.5257	54.34
MS401	0.4968	1.7388
MS402	2.3828	8.3398
MS403	1.1931	4.17585
MS404	0.74166	2.59581
MS405	1.56124	5.46434
MS406	0.336	1.176
MS407	1.45888	5.10608
MS408	1.51191	5.29169
MS409	1.09134	3.81969
MS410	1.41312	4.94592
MS411	0.63945	2.23808
MS412	3.7985	13.2948
MS413	0.80934	2.83269
MS414	0.97582	3.41537
MS415	0.582	2.037
MS416	0.61194	2.14179
MS417	0.40083	1.4029
MS418	0.2254	0.7889
MS419	0.65056	2.27696
MS420	0.57855	2.02493
MS421	0.3969	1.38915
MS422	0.60528	2.11848
MS423	0.344416	1.20546
MS424	0.4136	1.4476
MS425	0.33852	1.18482
MS426	0.42486	1.48701
MS427	2.6496	9.2736
MS428	2.6964	9.4374
MS429	2.8676	10.0366
MS430	1.9109	6.68815
MS431	0.58696	2.05436
MS432	0.40446	1.41561
MS433	0.660436	2.31153
MS434	1.2495	4.37325
MS435	0.44038	1.54133
MS436	8.0224	28.0784
MS437	1.0131	3.54584
MS438	1.40342	4.91197
MS439	2.8463	9.96205
MS440	0.49373	1.72805
MS441	0.33396	1.16886
MS442	3.32316	11.6311
MS443	0.66768	2.33688
MS444	0.48792	1.70772
MS445	2.48112	8.68392
MS446	3.5236	12.3326
MS447	0.4242	1.4847
MS448	1.03208	3.61228
MS449	0.9051	3.16785
MS450	0.502146	1.75751
MS451	4.1548	14.5418
MS452	0.7728	2.7048
MS453	3.1137	10.8979
MS454	1.08928	3.81248
MS455	3.0176	10.5616
MS456	27.21	95.235
MS457	2.56	8.96
MS458	4.45	15.575
MS459	1.95	6.825
MS460	1.46	5.11
MS461	2.08	7.28
MS462	2.12	7.42
MS463	11.26	39.41
MS464	7.53	26.355
MS465	6.56	22.96
MS466	4.25	14.875
MS467	20.67	72.345
MS468	27.71	96.985
MS469	25.571	89.4985
MS470	32.71	114.485
MS471	25.642	89.747
MS472	2.367	8.2845
MS473	1.972	6.902
MS474	7.216	25.256
MS475	1.856	6.496
MS476	2.335	8.1725

## Sheet: 2005
ID	Conductivity 0-10cm (ms/cm)	TDS
M001	3.39696	11.8894
M002	2.35712	8.24992
M003	0.235228	0.823298
M004	1.96736	6.88576
M005	2.62624	9.19184
M006	2.11576	7.40516
M007	5.35088	18.7281
M008	5.84766	20.4668
M009	5.2624	18.4184
M010	0.722466	2.52863
M011	15.2874	53.5059
M012	1.56965	5.49377
M013	142.057	497.198
M014	3.19704	11.1896
M015	1.42264	4.97925
M016	32.2896	113.014
M017	0.163184	0.571144
M018	0.241736	0.846076
M019	29.627	103.694
M020	0.81302	2.84557
M021	0.265408	0.928928
M022	0.205632	0.719712
M023	0.281344	0.984704
M024	0.664448	2.32557
M025	1.10134	3.85469
M026	0.13456	0.47096
M027	0.498336	1.74418
M028	0.37076	1.29766
M029	0.335936	1.17578
M030	5.7346	20.0711
M031	0.524342	1.8352
M032	3.95	13.825
M033	1.23161	4.31065
M034	0.11984	0.41944
M035	0.37884	1.32594
M036	6.825	23.8875
M037	4.123	14.4305
M038	7.46028	26.111
M039	2.97346	10.4071
M040	0.25844	0.90454
M041	3.0115	10.5403
M042	0.33108	1.15878
M043	1.7154	6.0039
M044	0.3051	1.06785
M045	0.2268	0.7938
M046	1.80753	6.32634
M047	0.547	1.9145
M048	1.05608	3.69627
M049	3.8556	13.4946
M050	1.974	6.909
M051	2.461	8.6135
M052	0.32635	1.14223
M053	0.85344	2.98704
M054	0.54126	1.89441
M055	0.61635	2.15723
M056	0.25944	0.90804
M057	0.437	1.5295
M058	0.22256	0.77896
M059	0.35052	1.22682
M060	0.66646	2.33261
M061	1.42978	5.00423
M062	1.53648	5.37768
M063	0.104652	0.366282
M064	0.67706	2.36971
M065	0.61846	2.16461
M066	3.128	10.948
M067	3.4989	12.2462
M068	1.68525	5.89837
M069	2.79524	9.78334
M070	1.44196	5.04686
M071	15.5257	54.34
M072	12.8619	45.0166
M073	2.7772	9.7202
M074	0.263	0.9205
M075	3.1464	11.0124
M076	0.6678	2.3373
M077	1.02114	3.57399
M078	1.77284	6.20494
M079	1.62012	5.67042
M080	6.0168	21.0588
M081	0.20832	0.72912
M082	5.0687	17.7404
M083	0.46314	1.62099
M084	0.601	2.1035
M085	2.9481	10.3183
M086	4.91	17.185
M087	2.12	7.42
M088	3.19	11.165
M089	1.2015	4.20525
M090	5.8032	20.3112
M091	0.693	2.4255
M092	28.83	100.905
M093	0.93651	3.27778
M094	3.9856	13.9496
M095	2.7918	9.7713
M096	1.2834	4.4919
M097	4.806	16.821
M098	3.2472	11.3652
M099	2.021	7.0735
M100	4.14	14.49
M101	0.92966	3.25381
M102	1.37898	4.82643
M103	1.23404	4.31913
M104	0.39292	1.37522
M105	0.64014	2.24049
M106	0.17108	0.59878
M107	3.3387	11.6854
M108	2.6884	9.4094
M109	0.73983	2.58941
M110	0.23124	0.80934
M111	1.03831	3.63408
M112	7.68096	26.8834
M113	3.18	11.13
M114	13.5778	47.5222
M115	4.717	16.5095
M116	3.5404	12.3914
M117	2.5228	8.8298
M118	3.384	11.844
M119	79.2	277.2
M120	2.772	9.702
M121	0.12096	0.42336
M122	2.2042	7.7147
M123	0.995904	3.48566
M124	8.7026	30.4591
M125	2.47776	8.67216
M126	0.468468	1.63964
M127	0.63	2.205
M128	0.281184	0.984144
M129	3.114	10.899
M130	1.15618	4.04662
M131	1.93024	6.75584
M132	0.8712	3.0492
M133	1.05514	3.69298
M134	0.1278	0.4473
M135	2.60154	9.10539
M136	0.616192	2.15667
M137	13.851	48.4785
M138	47.16	165.06
M139	2.44374	8.55309
M140	0.394796	1.38179
M141	0.123816	0.433356
M142	2.30178	8.05623
M143	5.24868	18.3704
M144	54.5104	190.786
M145	3.789	13.2615
M146	2.9072	10.1752
M147	1.22544	4.28904
M148	0.68582	2.40037
M149	0.277548	0.971418
M150	0.46818	1.63863
M151	0.42098	1.47343
M152	0.61272	2.14452
M153	4.048	14.168
M154	0.207	0.7245
M155	31.8556	111.495
M156	14.994	52.479
M157	2.1294	7.4529
M158	0.461776	1.61622
M159	0.205716	0.720006
M160	0.967572	3.3865
M161	75.1328	262.965
M162	2.6712	9.3492
M163	0.42504	1.48764
M164	0.263466	0.922131
M165	0.2295	0.80325
M166	1.30502	4.56756
M167	0.219402	0.767907
M168	1.31458	4.60102
M169	3.85154	13.4804
M170	3.40956	11.9335
M171	96.33	337.155
M172	3.078	10.773
M173	0.66156	2.31546
M174	0.237804	0.832314
M175	0.281232	0.984312
M176	0.382632	1.33921
M177	2.37804	8.32314
M178	2.98562	10.4497
M179	1.8662	6.5317
M180	3.05944	10.708
M181	0.265518	0.929313
M182	1.27362	4.45768
M183	0.341712	1.19599
M184	1.70251	5.95879
M185	0.82248	2.87868
M186	1.51897	5.31639
M187	35.9388	125.786
M188	5.34944	18.723
M189	0.31602	1.10607
M190	1.07585	3.76549
M191	0.712518	2.49381
M192	3.43662	12.0282
M193	0.20295	0.710325
M194	0.137676	0.481866
M195	2.303	8.0605
M196	3.17504	11.1126
M197	0.343296	1.20154
M198	0.294126	1.02944
M199	0.13079	0.457765
M200	0.444416	1.55546
M201	0.2133	0.74655
M202	2.23776	7.83216
M203	0.267306	0.935571
M204	0.381024	1.33358
M205	0.88852	3.10982
M206	65.7	229.95
M207	75.4974	264.241
M208	127.71	446.985
M209	0.9108	3.1878
M210	0.208848	0.730968
M211	0.285792	1.00027
M212	0.099296	0.347536
M213	0.138316	0.484106
M214	0.206976	0.724416
M215	0.114432	0.400512
M216	0.211584	0.740544
M217	0.3128	1.0948
M218	0.15114	0.52899
M219	0.305312	1.06859
M220	0.337792	1.18227
M221	0.333648	1.16777
M222	0.25024	0.87584
M223	2.116	7.406
M224	0.155232	0.543312
M225	0.573804	2.00831
M226	8.54784	29.9174
M227	0.339696	1.18894
M228	0.685184	2.39814
M229	0.341508	1.19528
M230	0.195808	0.685328
M231	0.242528	0.848848
M232	1.2983	4.54406
M233	0.23368	0.81788
M234	2.05842	7.20447
M235	0.113792	0.398272
M236	0.51304	1.79564
M237	0.40704	1.42464
M238	0.38364	1.34274
M239	0.28514	0.99799
M240	0.53084	1.85794
M241	0.39816	1.39356
M242	1.69946	5.94812
M243	0.35392	1.23872
M244	0.16704	0.58464
M245	0.200448	0.701568
M246	0.120098	0.420343
M247	0.610764	2.13767
M248	0.172788	0.604758
M249	0.45849	1.60472
M250	1.37994	4.82978
M251	0.139232	0.487312
M252	0.71126	2.48941
M253	0.480704	1.68246
M254	4.9922	17.4727
M255	1.75218	6.13263
M256	2.2048	7.7168
M257	0.3074	1.0759
M258	0.198592	0.695072
M259	1.67992	5.87972
M260	1.26858	4.44002
M261	0.275968	0.965888
M262	0.129156	0.452046
M263	0.364026	1.27409
M264	0.47488	1.66208
M265	0.269304	0.942564
M266	1.9021	6.65734
M267	0.243712	0.852992
M268	0.731808	2.56133
M269	0.646696	2.26344
M270	1.81888	6.36608
M271	0.741888	2.59661
M272	2.36262	8.26917
M273	0.410368	1.43629
M274	0.50508	1.76778
M275	2.71904	9.51664
M276	0.390656	1.3673
M277	0.463496	1.62224
M278	0.646912	2.26419
M279	0.3174	1.1109
M280	5.9148	20.7018
M281	0.33892	1.18622
M282	2.55528	8.94348
M283	0.244992	0.857472
M284	0.884352	3.09523
M285	1.13832	3.98412
M286	2.84928	9.97248
M287	1.5423	5.39805
M288	2.02884	7.10094
M289	1.27232	4.45313
M290	0.2748	0.9618
M291	32.0624	112.218
M292	0.22601	0.791035
M293	0.93174	3.26109
M294	3.0268	10.5938
M295	2.3184	8.1144
M296	0.67712	2.36992
M297	1.87691	6.5692
M298	0.875952	3.06583
M299	0.2977	1.04195
M300	6.76338	23.6718
M301	8.82768	30.8969
M302	2.556	8.946
M303	2.541	8.8935
M304	10.9771	38.4199
M305	0.781376	2.73482
M306	0.2862	1.0017
M307	0.34224	1.19784
M308	0.45903	1.60661
M309	0.197568	0.691488
M310	0.306	1.071
M311	3.3108	11.5878
M312	0.136422	0.477477
M313	1.77253	6.20386
M314	0.49685	1.73897
M315	1.73355	6.06743
M316	0.72695	2.54433
M317	1.6623	5.81805
M318	2.3219	8.12665
M319	1.927	6.7445
M320	1.16737	4.08579
M321	0.59563	2.08471
M322	2.38252	8.33882
M323	3.17982	11.1294
M324	0.223244	0.781354
M325	0.43228	1.51298
M326	0.41405	1.44918
M327	2.0097	7.03395
M328	53.2	186.2
M329	24.708	86.478
M330	1.52519	5.33816
M331	0.8667	3.03345
M332	0.3519	1.23165
M333	0.13104	0.45864
M334	0.77517	2.71309
M335	0.67164	2.35074
M336	0.676386	2.36735
M337	1.26126	4.41441
M338	0.4797	1.67895
M339	0.61439	2.15036
M340	0.24388	0.85358
M341	0.68541	2.39893
M342	0.7087	2.48045
M343	3.40578	11.9202
M344	0.30576	1.07016
M345	0.470876	1.64807
M346	0.624	2.184
M347	0.998	3.493
M348	0.33512	1.17292
M349	3.1122	10.8927
M350	4.7616	16.6656
M351	0.58029	2.03102
M352	0.437886	1.5326
M353	0.32592	1.14072
M354	1.54489	5.4071
M355	1.14224	3.99784
M356	0.678294	2.37403
M357	0.55601	1.94603
M358	0.24	0.84
M359	0.8397	2.93895
M360	0.7686	2.6901
M361	0.5913	2.06955
M362	48.124	168.434
M363	1.41596	4.95586
M364	3.303	11.5605
M365	2.3403	8.19105
M366	0.486	1.701
M367	0.4693	1.64255
M368	2.5608	8.9628
M369	0.2016	0.7056
M370	0.82745	2.89608
M371	0.892944	3.1253
M372	0.58331	2.04158
M373	2.6709	9.34815
M374	1.01964	3.56874
M375	0.65247	2.28364
M376	0.8778	3.0723
M377	2.1021	7.35735
M378	1.17117	4.0991
M379	1.291	4.5185
M380	1.89312	6.62592
M381	0.92983	3.25441
M382	1.5867	5.55345
M383	0.703098	2.46084
M384	1.40333	4.91167
M385	1.37137	4.79979
M386	0.73892	2.58622
M387	1.1007	3.85245
M388	0.30281	1.05984
M389	0.6783	2.37405
M390	0.5278	1.8473
M391	0.50397	1.7639
M392	0.369104	1.29186
M393	0.19902	0.69657
M394	0.9027	3.15945
M395	0.46788	1.63758
M396	0.5859	2.05065
M397	2.3861	8.35135
M398	0.267	0.9345
M399	2.7606	9.6621
M400	0.606048	2.12117
M401	0.4104	1.4364
M402	0.278	0.973
M403	0.2345	0.82075
M404	0.7809	2.73315
M405	0.669732	2.34406
M406	0.43977	1.53919
M407	0.22659	0.793065
M408	1.27309	4.45581
M409	0.33	1.155
M410	0.3843	1.34505
M411	6.6405	23.2417
M412	2.7492	9.6222
M413	0.88825	3.10887
M414	0.40572	1.42002
M415	0.19152	0.67032
M416	2.8119	9.84165
M417	1.10403	3.86409
M418	0.4581	1.60335
M419	1.7922	6.2727
M420	1.19847	4.19464
M421	3.6792	12.8772
M422	0.824502	2.88576
M423	2.8797	10.0789
M424	3.3048	11.5668
M425	1.77365	6.20778
M426	32.7699	114.695
M427	1.81059	6.33707
M428	0.49373	1.72805
M429	0.5463	1.91205
M430	1.33315	4.66603
M431	28.2338	98.8183
M432	1.11693	3.90925
M433	0.28449	0.995715
M434	0.34295	1.20032
M435	0.78435	2.74523
M436	1.11412	3.89942
M437	3.8728	13.5548
M438	3.358	11.753
M439	15.5257	54.34
M440	0.4968	1.7388
M441	2.3828	8.3398
M442	1.1931	4.17585
M443	0.74166	2.59581
M444	1.56124	5.46434
M445	0.336	1.176
M446	1.45888	5.10608
M447	1.51191	5.29169
M448	1.09134	3.81969
M449	1.41312	4.94592
M450	0.63945	2.23808
M451	3.7985	13.2948
M452	0.80934	2.83269
M453	0.97582	3.41537
M454	0.582	2.037
M455	0.61194	2.14179
M456	0.40083	1.4029
M457	0.2254	0.7889
M458	0.65056	2.27696
M459	0.57855	2.02493
M460	0.3969	1.38915
M461	0.60528	2.11848
M462	0.344416	1.20546
M463	0.4136	1.4476
M464	0.33852	1.18482
M465	0.42486	1.48701
M466	2.6496	9.2736
M467	2.6964	9.4374
M468	2.8676	10.0366
M469	1.9109	6.68815
M470	0.58696	2.05436
M471	0.40446	1.41561
M472	0.660436	2.31153
M473	1.2495	4.37325
M474	0.44038	1.54133
M475	8.0224	28.0784
M476	1.0131	3.54584
M477	1.40342	4.91197
M478	2.8463	9.96205
M479	0.49373	1.72805
M480	0.33396	1.16886
M481	3.32316	11.6311
M482	0.66768	2.33688
M483	0.48792	1.70772
M484	2.48112	8.68392
M485	3.5236	12.3326
M486	0.4242	1.4847
M487	1.03208	3.61228
M488	0.9051	3.16785
M489	0.502146	1.75751
M490	4.1548	14.5418
M491	0.7728	2.7048
M492	3.1137	10.8979
M493	1.08928	3.81248
M494	3.0176	10.5616
M495	0.37736	1.32076
M496	1.49594	5.23578
M497	2.8396	9.9386
M498	2.799	9.7965
M499	0.701316	2.45461
M500	4.52574	15.8401
M501	1.98592	6.95072
M502	0.89552	3.13432
M503	2.71728	9.51048
M504	2.50458	8.76603
M505	1.9251	6.73785
M506	1.932	6.762
M507	2.72766	9.54681
M508	0.4836	1.6926
M509	7.86	27.51
M510	0.40362	1.41267
M511	4.2964	15.0374
M512	0.41951	1.46829
M513	0.52224	1.82784
M514	2.7885	9.75975
M515	0.756616	2.64816
M516	5.07464	17.7612
M517	0.55876	1.95566
M518	0.56672	1.98352
M519	1.946	6.811
M520	0.45198	1.58193
M521	3.0144	10.5504
M522	1.30328	4.56148
M523	0.735	2.5725
M524	0.469908	1.64468
M525	0.80538	2.81883
M526	1.93276	6.76466
M527	0.39897	1.3964
M528	1.53548	5.37418
M529	3.6616	12.8156
M530	0.390566	1.36698
M531	0.38841	1.35944
M532	0.38632	1.35212
M533	0.548684	1.92039
M534	3.6177	12.6619
M535	1.8778	6.5723
M536	1.26	4.41
M537	0.43763	1.53171
M538	0.4194	1.4679
M539	0.59613	2.08645
M540	3.634	12.719
M541	0.5913	2.06955
M542	0.56544	1.97904
M543	0.498	1.743
M544	0.34689	1.21411
M545	7.31646	25.6076
M546	0.5658	1.9803
M547	1.07508	3.76278
M548	4.0128	14.0448
M549	0.5859	2.05065
M550	0.31416	1.09956
M551	0.35972	1.25902
M552	6.7425	23.5987
M553	0.38037	1.33129
M554	0.209	0.7315
M555	2.32206	8.12721
M556	0.41888	1.46608
M557	0.5706	1.9971
M558	2.0148	7.0518
M559	8.3514	29.2299
M560	0.89516	3.13306
M561	0.32	1.12
M562	0.694	2.429
M563	2.32	8.12
M564	0.495	1.7325
M565	3.4592	12.1072
M566	27.21	95.235
M567	3.56	12.46
M568	4.45	15.575
M569	1.95	6.825
M570	1.46	5.11
M571	2.08	7.28
M572	2.12	7.42
M573	1.21	4.235
M574	11.26	39.41
M575	7.53	26.355
M576	6.56	22.96
M577	4.25	14.875
M578	20.67	72.345

## Sheet: 2015
ID	Conductivity 0-10cm (ms/cm)	TDS
136	0.365	1.2775
140	0.308	1.078
148	0.426	1.491
150	0.35	1.225
155	0.619	2.1665
169	0.588	2.058
210	0.29	1.015
212	0.287	1.0045
213	0.338	1.183
BH1	13.21	46.235
BH1-1	3.782	13.237
BH1-2	13.467	47.1345
BH1-3	3.873	13.5555
BH1-4	3.977	13.9195
BH1-5	3.772	13.202
BH1-6	2.876	10.066
BH15	3.45	12.075
BH15-1	1.95	6.825
BH17	0.46	1.61
BH18	2.12	7.42
BH18-1	1.21	4.235
BH18-2	11.26	39.41
BH18-3	9.32	32.62
BH18-4	3.621	12.6735
BH18-5	2.764	9.674
BH18-6	7.53	26.355
BH18-7	2.56	8.96
BH18-8	3.25	11.375
BH18-9	4.67	16.345
BH18-10	3.74	13.09
BH18-11	3.25	11.375
BH18-12	3.672	12.852
YQ10	0.838	2.933
YQ02	0.2771	0.96985
YQ32	2.82	9.87
YQ11	6.56	22.96
YQ33	0.3881	1.35835
YQ34	1.635	5.7225
YQ39-2	0.701	2.4535
YQ12	1.071	3.7485
M049	0.312	1.092
BH35	48.56	169.96
BH33	32.84	114.94
BH31	7.91	27.685
M071	8.25	28.875
M064	1.868	6.538
BH10	0.2706	0.9471
BH09	0.377	1.3195
BH08	2.66	9.31
BH07	2.96	10.36
HJ14	0.2904	1.0164
HJ15	4.64	16.24
HJ16	0.402	1.407
HJ35	87.7	306.95
HJ35-1	56.883	199.091
HJ35-2	2.734	9.569
HJ35-3	2.154	7.539
HJ35-4	57.871	202.549
HJ35-5	3.887	13.6045
HJ35-6	1.876	6.566
HJ35-7	1.788	6.258
HJ35-8	2.412	8.442
HJ35-9	2.481	8.6835
HJ35-10	1.082	3.787
M053	2.075	7.2625
HS2	11.43	40.005
HS2-1	2.134	7.469
HS40	0.952	3.332
HS3	0.866	3.031
HJ36	0.929	3.2515
HJ32	0.233	0.8155
HJ31	0.234	0.819
HJ28	2.06	7.21
HJ27	0.954	3.339
M028	1.057	3.6995
HJ23	6.1	21.35
M024	1.124	3.934
HJ39	1.032	3.612
HJ12	0.304	1.064
HJ10	1.88	6.58
HJ9	0.313	1.0955
HJ8	0.168	0.588
HJ7	0.624	2.184
HJ6	1.363	4.7705
HJ5	4.47	15.645
HJ30	1.0993	3.84755
HJ11	0.275	0.9625
HJ38	1.075	3.7625
HJ20	10.2	35.7
HJ18	2.78	9.73
HS38	5.78	20.23
HS37	1.944	6.804
HS36	35.64	124.74
HS15	2.81	9.835
HS14	51.65	180.775
HS12	1.1403	3.99105
HS6	1.336	4.676
HS5	1.886	6.601
HS4	0.1633	0.57155
HS19	0.308	1.078
HS20	0.3757	1.31495
HS26	0.497	1.7395
HS10	0.713	2.4955
HS45	4.12	14.42
M009	23.55	82.425
HS28	4.32	15.12
HS47	6.46	22.61
M034	0.86	3.01
HS001	3.87	13.545
HS002	13.76	48.16
HS003	7.32	25.62
HS004	8.78	30.73
HS005	12.33	43.155
HS006	26.67	93.345
HS007	23.12	80.92
HS008	18.67	65.345
HS009	18.35	64.225
HS010	1.223	4.2805
HS011	1.857	6.4995
HS012	3.356	11.746
HS013	9.012	31.542
HS014	36.223	126.78
HS015	31.251	109.379
HS016	33.283	116.49
HS017	3.784	13.244
HS018	3.779	13.2265
HS019	6.775	23.7125
HS020	4.112	14.392
HS021	4.023	14.0805
HS022	17.312	60.592
HS023	3.556	12.446
HS024	28.332	99.162
HS025	3.126	10.941
HS026	0.985	3.4475
HS027	1.347	4.7145
HS028	1.578	5.523
HS029	2.112	7.392
HS030	0.956	3.346

## Sheet: 2020
ID	Conductivity 0-10cm (ms/cm)	TDS
YQ10	0.738	2.583
YQ02	0.1771	0.61985
YQ32	2.02	7.07
YQ11	6.56	22.96
YQ33	0.1881	0.65835
YQ34	1.635	5.7225
YQ39-2	0.501	1.7535
YQ12	0.771	2.6985
M049	0.212	0.742
YQ136	0.365	1.2775
YQ140	0.308	1.078
YQ148	0.426	1.491
YQ150	0.35	1.225
YQ155	0.619	2.1665
YQ169	0.588	2.058
YQ210	0.29	1.015
YQ212	0.287	1.0045
YQ213	0.338	1.183
BH1	26.88	94.08
BH1-1	3.782	13.237
BH1-2	13.467	47.1345
BH1-3	3.873	13.5555
BH1-4	3.977	13.9195
BH1-5	3.772	13.202
BH1-6	2.876	10.066
BH15	3.44	12.04
BH15-1	1.95	6.825
BH17	0.352	1.232
BH18	2.12	7.42
BH18-1	1.09	3.815
BH18-2	11.26	39.41
BH18-3	9.32	32.62
BH18-4	1.621	5.6735
BH18-5	2.764	9.674
BH18-6	7.53	26.355
BH18-7	2.56	8.96
BH18-8	2.25	7.875
BH18-9	3.67	12.845
BH35	47.56	166.46
BH33	30.84	107.94
BH35-1	3.337	11.6795
BH33-1	1772	6202
BH31-1	1.273	4.4555
BH31	7.71	26.985
M071	8.1	28.35
M064	1.568	5.488
BH10	0.1706	0.5971
BH09	0.377	1.3195
BH08	2.54	8.89
BH07	2.8	9.8
HJ14	0.0904	0.3164
HJ15	4.64	16.24
HJ16	0.402	1.407
HJ35	57.7	201.95
HJ35-1	56.883	199.091
HJ35-2	1.734	6.069
HJ35-3	1.154	4.039
HJ35-4	57.871	202.549
HJ35-5	1.887	6.6045
HJ35-6	1.876	6.566
HJ35-7	1.788	6.258
HJ35-8	2.412	8.442
HJ35-9	1.481	5.1835
HJ35-10	1.082	3.787
HJ36	0.929	3.2515
HJ32	0.233	0.8155
HJ31	0.234	0.819
HJ28	2.06	7.21
HJ27	0.754	2.639
HJ12	0.304	1.064
HJ10	1.713	5.9955
HJ9	0.213	0.7455
HJ8	0.168	0.588
HJ7	0.624	2.184
HJ6	1.363	4.7705
HJ5	4.47	15.645
HJ30	0.0993	0.34755
HJ11	0.275	0.9625
HJ38	1.075	3.7625
HJ20	10.2	35.7
HJ18	2.78	9.73
HJ20-1	0.981	3.4335
HJ18-1	1.032	3.612
HJ39	0.232	0.812
HJ23	6.1	21.35
M053	1.075	3.7625
HS40	0.952	3.332
HS3	0.866	3.031
M028	1.057	3.6995
M024	1.124	3.934
HS38	5.78	20.23
HS37	1.944	6.804
HS15	2.81	9.835
HS12	0.1403	0.49105
HS6	1.336	4.676
HS5	1.486	5.201
HS4	0.1633	0.57155
HS19	0.308	1.078
HS20	0.1757	0.61495
HS26	0.497	1.7395
HS10	0.313	1.0955
HS45	3.97	13.895
HS45-1	3.231	11.3085
HS28	4.32	15.12
HS28-1	2.11	7.385
HS47	6.46	22.61
M034	0.86	3.01
HS36	35.64	124.74
HS2	10.43	36.505
HS14	49.65	173.775
M009	32.55	113.925
HS001	3.87	13.545
HS002	13.76	48.16
HS003	6.32	22.12
HS004	7.78	27.23
HS005	7.33	25.655
HS006	26.67	93.345
HS007	23.12	80.92
HS008	18.67	65.345
HS009	18.35	64.225
HS010	1.223	4.2805
HS011	1.857	6.4995
HS012	1.956	6.846
HS013	7.012	24.542
HS014	36.223	126.78
HS015	31.251	109.379
HS016	33.283	116.49
HS017	3.784	13.244
HS018	3.779	13.2265
HS019	6.775	23.7125
HS020	4.112	14.392
HS021	4.023	14.0805
HS022	17.312	60.592
HS023	3.556	12.446
HS024	28.332	99.162
HS025	1.926	6.741
HS026	0.985	3.4475
HS027	1.347	4.7145
HS028	1.578	5.523
HS029	1.812	6.342
HS030	0.956	3.346
k1	1.211	4.2385
k2	1.103	3.8605
k3	0.995	3.4825
k4	0.887	3.1045
k5	0.779	2.7265
k6	1.671	5.8485
k7	1.563	5.4705
